# Supplementary material for: Scheduling orders on either dedicated or flexible machines in parallel to minimize total weighted completion time
Source: Springer Nature journal article supplement (doi:10.1007/s10479-007-0270-5), 2007-11-30
Supplement: 10479_2007_270_MOESM1_ESM.pdf [file 10479_2007_270_MOESM1_ESM.pdf]

## Experimental Results for $PD \parallel \sum w_j C_j$

Tables 1 to 5 show the frequencies of each algorithm producing the best solution. The data in the columns are the number of instances (out of 20 for each combination of  $n$  and  $m$ ) for which the corresponding algorithms produce the best solutions. Note that for each instance, there might be more than one algorithms that produce the best solution. Thus, the sum of the entries in each row could be larger than 20.

Tables 6 to 10 show the positive ratios of the algorithms that are higher than the average costs of the best algorithms. In addition to the same field labels defined for Tables 1 to 5, we introduce five more fields:

- $T_1$ : The average running time (seconds) per instance for all five priority rules together.
- $T_2$ : The average running time (seconds) per instance for  $LP_1$ .
- $T_3$ : The average running time (seconds) per instance for  $LP'_2$ .
- $T_4$ : The average running time (seconds) per instance for  $LP''_2$ .
- $T_5$ : The average running time (seconds) per instance for  $LP'''_2$ .

The entries in the columns of the above four fields are simply the average running time in seconds per instance, as defined above. Now focus on the columns corresponding to the algorithms. For these columns, a “–” indicates that an algorithm produces the minimum average objective cost. Note that each row has one and only one “–” for each combination of  $n$  and  $m$ . In each row, the entries other than “–” are computed as:

$$\frac{\text{The average cost of corresponding algorithm} - \text{The minimum average cost}}{\text{The minimum average cost}} \times 100.$$

Table 11 shows the percentages that the average costs of  $LP''_2$  and  $LP'''_2$  are larger than that of  $LP'_2$ .

Table 1: The frequency that each algorithm performs the best for instances of group  $G_1$

| $n$ | $m$ | $WSTP$ | $WSMP$ | $WSMC$ | $WSPL$ | $WECT$ | $LP_1$ | $LP'_2$ | $LP''_2$ | $LP'''_2$ |
|-----|-----|--------|--------|--------|--------|--------|--------|---------|----------|-----------|
| 20  | 2   | 0      | 0      | 0      | 0      | 8      | 9      | 5       | 0        | 0         |
|     | 5   | 0      | 0      | 0      | 0      | 6      | 12     | 7       | 0        | 0         |
|     | 10  | 0      | 0      | 0      | 0      | 5      | 10     | 5       | 1        | 0         |
|     | 20  | 0      | 0      | 0      | 0      | 5      | 12     | 6       | 0        | 0         |
| 50  | 2   | 0      | 0      | 0      | 0      | 4      | 8      | 11      | 1        | 0         |
|     | 5   | 0      | 0      | 0      | 0      | 2      | 10     | 9       | 2        | 0         |
|     | 10  | 0      | 0      | 0      | 0      | 3      | 11     | 10      | 0        | 0         |
|     | 20  | 0      | 0      | 0      | 0      | 2      | 9      | 9       | 0        | 0         |
| 100 | 2   | 0      | 0      | 0      | 0      | 1      | 2      | 18      | 0        | 0         |
|     | 5   | 0      | 0      | 0      | 0      | 0      | 4      | 16      | 0        | 0         |
|     | 10  | 0      | 0      | 0      | 0      | 1      | 2      | 17      | 0        | 0         |
|     | 20  | 0      | 0      | 0      | 0      | 0      | 4      | 16      | 0        | 0         |
| 200 | 2   | 0      | 0      | 0      | 0      | 0      | 1      | 19      | 0        | 0         |
|     | 5   | 0      | 0      | 0      | 0      | 0      | 2      | 18      | 0        | 0         |
|     | 10  | 0      | 0      | 0      | 0      | 0      | 0      | 20      | 0        | 0         |
|     | 20  | 0      | 0      | 0      | 0      | 0      | 0      | 20      | 0        | 0         |

Table 2: The frequency that each algorithm performs the best for instances of group  $G_2$

| $n$ | $m$ | $WSTP$ | $WSMP$ | $WSMC$ | $WSPL$ | $WECT$ | $LP_1$ | $LP'_2$ | $LP''_2$ | $LP'''_2$ |
|-----|-----|--------|--------|--------|--------|--------|--------|---------|----------|-----------|
| 20  | 2   | 0      | 0      | 0      | 0      | 8      | 9      | 6       | 0        | 0         |
|     | 5   | 0      | 0      | 0      | 0      | 5      | 8      | 7       | 0        | 0         |
|     | 10  | 0      | 0      | 0      | 0      | 6      | 10     | 6       | 1        | 0         |
|     | 20  | 0      | 0      | 0      | 0      | 4      | 8      | 10      | 0        | 0         |
| 50  | 2   | 0      | 0      | 0      | 0      | 5      | 11     | 9       | 0        | 0         |
|     | 5   | 0      | 0      | 0      | 0      | 6      | 8      | 10      | 1        | 0         |
|     | 10  | 0      | 0      | 0      | 0      | 4      | 6      | 12      | 0        | 0         |
|     | 20  | 0      | 0      | 0      | 0      | 3      | 4      | 13      | 0        | 0         |
| 100 | 2   | 0      | 0      | 0      | 0      | 2      | 8      | 12      | 0        | 0         |
|     | 5   | 0      | 0      | 0      | 0      | 3      | 5      | 15      | 0        | 0         |
|     | 10  | 0      | 0      | 0      | 0      | 0      | 6      | 14      | 0        | 0         |
|     | 20  | 0      | 0      | 0      | 0      | 3      | 5      | 12      | 0        | 0         |
| 200 | 2   | 0      | 0      | 0      | 0      | 1      | 4      | 15      | 0        | 0         |
|     | 5   | 0      | 0      | 0      | 0      | 0      | 1      | 19      | 0        | 0         |
|     | 10  | 0      | 0      | 0      | 0      | 0      | 0      | 20      | 1        | 0         |
|     | 20  | 0      | 0      | 0      | 0      | 0      | 0      | 20      | 0        | 0         |

Table 3: The frequency that each algorithm performs best for instances of group  $G_3$

| $n$ | $m$ | $WSTP$ | $WSMP$ | $WSMC$ | $WSPL$ | $WECT$ | $LP_1$ | $LP'_2$ | $LP''_2$ | $LP'''_2$ |
|-----|-----|--------|--------|--------|--------|--------|--------|---------|----------|-----------|
| 20  | 2   | 2      | 1      | 2      | 0      | 3      | 7      | 5       | 0        | 0         |
|     | 5   | 1      | 2      | 2      | 1      | 6      | 4      | 5       | 0        | 0         |
|     | 10  | 2      | 2      | 1      | 0      | 9      | 3      | 6       | 1        | 0         |
|     | 20  | 2      | 1      | 1      | 0      | 7      | 4      | 5       | 0        | 0         |
| 50  | 2   | 2      | 1      | 0      | 2      | 9      | 6      | 4       | 0        | 0         |
|     | 5   | 0      | 2      | 0      | 0      | 6      | 7      | 8       | 0        | 0         |
|     | 10  | 2      | 1      | 0      | 0      | 8      | 5      | 7       | 0        | 0         |
|     | 20  | 1      | 2      | 0      | 0      | 6      | 7      | 7       | 0        | 0         |
| 100 | 2   | 1      | 3      | 0      | 0      | 16     | 2      | 2       | 0        | 0         |
|     | 5   | 2      | 0      | 0      | 0      | 8      | 5      | 8       | 0        | 0         |
|     | 10  | 0      | 0      | 0      | 0      | 12     | 3      | 5       | 0        | 0         |
|     | 20  | 0      | 0      | 0      | 0      | 11     | 1      | 8       | 0        | 0         |
| 200 | 2   | 1      | 0      | 0      | 0      | 19     | 1      | 1       | 0        | 0         |
|     | 5   | 0      | 1      | 0      | 0      | 16     | 1      | 3       | 0        | 0         |
|     | 10  | 0      | 0      | 0      | 0      | 13     | 3      | 4       | 0        | 0         |
|     | 20  | 0      | 0      | 0      | 0      | 17     | 2      | 2       | 0        | 0         |

Table 4: The frequency that each algorithm performs the best for instances of group  $G_4$

| $n$ | $m$ | <i>WSTP</i> | <i>WSMP</i> | <i>WSMC</i> | <i>WSPL</i> | <i>WECT</i> | $LP_1$ | $LP'_2$ | $LP''_2$ | $LP'''_2$ |
|-----|-----|-------------|-------------|-------------|-------------|-------------|--------|---------|----------|-----------|
| 20  | 2   | 1           | 3           | 2           | 0           | 9           | 2      | 3       | 1        | 1         |
|     | 5   | 2           | 2           | 1           | 1           | 7           | 1      | 1       | 2        | 0         |
|     | 10  | 3           | 2           | 1           | 0           | 6           | 2      | 4       | 0        | 0         |
|     | 20  | 2           | 2           | 1           | 0           | 9           | 3      | 3       | 0        | 1         |
| 50  | 2   | 1           | 1           | 1           | 0           | 12          | 2      | 3       | 0        | 0         |
|     | 5   | 2           | 1           | 1           | 0           | 10          | 3      | 3       | 1        | 0         |
|     | 10  | 0           | 0           | 0           | 0           | 12          | 3      | 5       | 0        | 0         |
|     | 20  | 1           | 0           | 0           | 0           | 13          | 4      | 2       | 0        | 0         |
| 100 | 2   | 0           | 0           | 0           | 0           | 14          | 3      | 4       | 0        | 0         |
|     | 5   | 0           | 1           | 0           | 0           | 12          | 2      | 5       | 0        | 0         |
|     | 10  | 0           | 0           | 0           | 0           | 15          | 1      | 4       | 0        | 0         |
|     | 20  | 1           | 0           | 0           | 0           | 18          | 0      | 1       | 0        | 0         |
| 200 | 2   | 0           | 0           | 0           | 0           | 16          | 1      | 3       | 0        | 0         |
|     | 5   | 1           | 0           | 0           | 0           | 18          | 0      | 1       | 0        | 0         |
|     | 10  | 0           | 0           | 0           | 0           | 17          | 1      | 2       | 0        | 0         |
|     | 20  | 0           | 0           | 0           | 0           | 18          | 1      | 1       | 0        | 0         |

Table 5: The frequency that each algorithm performs best for instances of group  $G_5$

| $n$ | $m$ | <i>WSTP</i> | <i>WSMP</i> | <i>WSMC</i> | <i>WSPL</i> | <i>WECT</i> | $LP_1$ | $LP'_2$ | $LP''_2$ | $LP'''_2$ |
|-----|-----|-------------|-------------|-------------|-------------|-------------|--------|---------|----------|-----------|
| 20  | 2   | 1           | 0           | 0           | 0           | 2           | 9      | 7       | 0        | 0         |
|     | 5   | 0           | 0           | 0           | 0           | 0           | 9      | 11      | 0        | 0         |
|     | 10  | 0           | 0           | 0           | 0           | 0           | 11     | 9       | 0        | 0         |
|     | 20  | 0           | 0           | 0           | 0           | 1           | 9      | 10      | 1        | 0         |
| 50  | 2   | 0           | 0           | 0           | 0           | 0           | 8      | 12      | 0        | 0         |
|     | 5   | 0           | 0           | 0           | 0           | 1           | 10     | 9       | 0        | 0         |
|     | 10  | 0           | 0           | 0           | 0           | 0           | 8      | 12      | 0        | 0         |
|     | 20  | 0           | 0           | 0           | 0           | 0           | 6      | 14      | 0        | 0         |
| 100 | 2   | 0           | 0           | 0           | 0           | 0           | 6      | 14      | 0        | 0         |
|     | 5   | 0           | 0           | 0           | 0           | 0           | 7      | 13      | 0        | 0         |
|     | 10  | 0           | 0           | 0           | 0           | 0           | 3      | 17      | 1        | 0         |
|     | 20  | 0           | 0           | 0           | 0           | 0           | 1      | 19      | 0        | 0         |
| 200 | 2   | 0           | 0           | 0           | 0           | 0           | 2      | 18      | 0        | 0         |
|     | 5   | 0           | 0           | 0           | 0           | 0           | 1      | 19      | 0        | 0         |
|     | 10  | 0           | 0           | 0           | 0           | 0           | 2      | 18      | 0        | 0         |
|     | 20  | 0           | 0           | 0           | 0           | 0           | 1      | 19      | 0        | 0         |

Table 6: Comparison of average costs in percentage and average running times for group  $G_1$ 

| $n$ | $m$ | $WSTP$ | $WSMP$ | $WSMC$ | $WSPL$ | $WECT$ | $LP_1$ | $LP'_2$ | $LP''_2$ | $LP'''_2$ | $T_1$ | $T_2$ | $T_3$ | $T_4$ | $T_5$ |
|-----|-----|--------|--------|--------|--------|--------|--------|---------|----------|-----------|-------|-------|-------|-------|-------|
| 20  | 2   | 5.27   | 5.96   | 3.05   | 5.28   | 0.06   | -      | 0.12    | 0.21     | 2.39      | 0.00  | 0.18  | 0.43  | 0.07  | 0.01  |
|     | 5   | 8.53   | 8.41   | 4.82   | 17.10  | 2.42   | -      | 0.47    | 1.26     | 2.85      | 0.00  | 0.38  | 1.35  | 0.29  | 0.06  |
|     | 10  | 11.27  | 10.73  | 8.72   | 20.10  | 2.66   | -      | 1.22    | 2.52     | 3.39      | 0.02  | 1.00  | 2.46  | 0.43  | 0.08  |
| 50  | 20  | 15.93  | 14.33  | 9.22   | 22.91  | 3.20   | -      | 0.03    | 2.11     | 2.26      | 0.02  | 2.78  | 6.92  | 0.87  | 0.15  |
|     | 2   | 4.49   | 5.77   | 3.56   | 7.13   | 0.92   | 0.62   | -       | 0.98     | 2.11      | 0.02  | 1.10  | 3.07  | 0.63  | 0.20  |
|     | 5   | 6.28   | 8.79   | 4.52   | 13.47  | 1.10   | -      | 1.53    | 4.83     | 7.44      | 0.02  | 2.89  | 9.58  | 1.78  | 0.42  |
| 100 | 10  | 9.18   | 11.11  | 6.83   | 17.97  | 1.79   | -      | 0.17    | 0.53     | 1.43      | 0.03  | 6.59  | 19.33 | 3.34  | 0.68  |
|     | 20  | 11.59  | 14.00  | 8.98   | 23.14  | 3.27   | -      | 2.36    | 3.25     | 6.20      | 0.02  | 12.35 | 41.51 | 6.90  | 1.21  |
|     | 2   | 3.01   | 4.75   | 2.08   | 8.86   | 1.51   | 1.23   | -       | 1.02     | 4.72      | 0.04  | 6.10  | 16.24 | 3.73  | 1.26  |
| 200 | 5   | 6.80   | 8.02   | 3.48   | 17.01  | 3.97   | 1.91   | -       | 0.90     | 4.54      | 0.07  | 10.25 | 40.35 | 8.18  | 2.24  |
|     | 10  | 7.37   | 9.91   | 4.16   | 20.47  | 4.17   | 2.47   | -       | 0.74     | 3.35      | 0.08  | 27.84 | 83.68 | 15.09 | 3.46  |
|     | 20  | 8.84   | 11.76  | 5.21   | 24.48  | 4.66   | 2.74   | -       | 0.29     | 1.25      | 0.09  | 72.30 | 192   | 32.81 | 5.95  |
| 200 | 2   | 2.86   | 4.10   | 3.33   | 8.48   | 0.94   | 0.70   | -       | 1.12     | 1.75      | 0.08  | 45.87 | 117   | 28.94 | 10.92 |
|     | 5   | 6.63   | 7.36   | 4.09   | 16.60  | 3.83   | 2.79   | -       | 1.21     | 2.78      | 0.09  | 72.33 | 229   | 48.48 | 14.11 |
|     | 10  | 6.72   | 8.67   | 6.88   | 22.71  | 4.33   | 2.46   | -       | 1.08     | 2.03      | 0.10  | 144   | 481   | 83.95 | 21.65 |
|     | 20  | 9.23   | 9.61   | 7.64   | 27.39  | 6.56   | 3.02   | -       | 1.52     | 2.88      | 0.09  | 396   | 1454  | 160   | 31.54 |

Table 7: Comparison of average costs in percentage and average running times for group  $G_2$ 

| $n$ | $m$ | $WSTP$ | $WSMP$ | $WSMC$ | $WSPL$ | $WECT$ | $LP_1$ | $LP'_2$ | $LP''_2$ | $LP'''_2$ | $T_1$ | $T_2$ | $T_3$ | $T_4$ | $T_5$ |
|-----|-----|--------|--------|--------|--------|--------|--------|---------|----------|-----------|-------|-------|-------|-------|-------|
| 20  | 2   | 2.80   | 3.03   | 2.42   | 6.92   | 1.51   | 1.61   | -       | 0.31     | 2.32      | 0.00  | 0.11  | 0.38  | 0.07  | 0.01  |
|     | 5   | 3.62   | 4.62   | 3.26   | 7.23   | -      | 0.23   | 0.15    | 0.37     | 1.77      | 0.00  | 0.53  | 1.65  | 0.23  | 0.04  |
|     | 10  | 4.25   | 4.72   | 3.45   | 8.92   | 0.13   | -      | 0.15    | 0.41     | 1.88      | 0.02  | 2.16  | 6.05  | 0.51  | 0.10  |
| 50  | 20  | 4.87   | 6.06   | 4.53   | 12.06  | -      | 0.16   | 0.23    | 0.26     | 1.60      | 0.02  | 4.71  | 14.51 | 1.77  | 0.27  |
|     | 2   | 3.06   | 4.30   | 3.02   | 8.68   | 1.03   | 0.68   | -       | 0.74     | 3.30      | 0.02  | 0.88  | 3.11  | 0.69  | 0.22  |
|     | 5   | 4.95   | 4.97   | 4.02   | 9.59   | -      | 0.03   | 0.07    | 0.80     | 2.43      | 0.02  | 3.21  | 10.04 | 1.75  | 0.39  |
| 100 | 10  | 5.08   | 6.90   | 5.30   | 11.90  | 0.41   | 0.12   | -       | 0.74     | 2.30      | 0.03  | 10.77 | 34.95 | 4.20  | 0.81  |
|     | 20  | 6.44   | 7.43   | 6.67   | 13.65  | 0.39   | 0.04   | -       | 0.88     | 2.14      | 0.05  | 52.51 | 172   | 12.28 | 2.14  |
|     | 2   | 2.99   | 4.64   | 3.87   | 6.91   | 0.36   | 0.99   | -       | 1.16     | 3.28      | 0.02  | 6.04  | 16.23 | 3.89  | 1.27  |
| 200 | 5   | 4.14   | 4.95   | 4.34   | 12.57  | 0.83   | 0.74   | -       | 1.20     | 3.32      | 0.05  | 14.55 | 46.55 | 8.34  | 2.07  |
|     | 10  | 5.96   | 6.68   | 4.97   | 14.56  | 0.51   | 0.42   | -       | 1.41     | 2.90      | 0.10  | 45.22 | 167   | 18.13 | 4.01  |
|     | 20  | 4.82   | 7.61   | 5.05   | 18.37  | 1.18   | -      | 0.08    | 0.88     | 2.84      | 0.09  | 204   | 663   | 55.74 | 8.99  |
| 200 | 2   | 1.67   | 3.24   | 2.87   | 7.72   | 1.06   | 0.93   | -       | 0.73     | 3.73      | 0.09  | 40.76 | 104   | 28.29 | 10.20 |
|     | 5   | 4.17   | 5.63   | 5.52   | 13.77  | 0.81   | 1.05   | -       | 1.47     | 3.76      | 0.09  | 77.55 | 285   | 53.63 | 15.91 |
|     | 10  | 5.54   | 7.09   | 5.60   | 14.29  | 1.12   | 0.73   | -       | 1.21     | 3.32      | 0.08  | 311   | 1072  | 119   | 26.74 |
|     | 20  | 4.28   | 6.36   | 4.18   | 15.33  | 0.57   | 0.72   | -       | 1.29     | 2.91      | 0.07  | 1393  | 5278  | 400   | 65.02 |

Table 8: Comparison of average costs in percentage and average running times for group  $G_3$ 

| $n$ | $m$ | $WSTP$ | $WSMP$ | $WSMC$ | $WSPL$ | $WECT$ | $LP_1$ | $LP'_2$ | $LP''_2$ | $LP'''_2$ | $T_1$ | $T_2$ | $T_3$ | $T_4$ | $T_5$ |
|-----|-----|--------|--------|--------|--------|--------|--------|---------|----------|-----------|-------|-------|-------|-------|-------|
| 20  | 2   | 1.46   | 1.71   | 1.98   | 2.37   | 0.05   | 0.16   | -       | 0.13     | 1.33      | 0.00  | 0.19  | 0.46  | 0.04  | 0.01  |
|     | 5   | 1.73   | 2.43   | 1.29   | 3.55   | -      | 0.00   | 0.02    | 0.13     | 0.79      | 0.00  | 0.31  | 1.23  | 0.10  | 0.02  |
|     | 10  | 2.07   | 2.34   | 1.34   | 3.10   | -      | 0.04   | 0.27    | 0.38     | 1.32      | 0.00  | 0.96  | 3.45  | 0.23  | 0.05  |
| 50  | 20  | 1.92   | 1.89   | 1.64   | 4.25   | 0.23   | -      | 0.57    | 0.64     | 1.46      | 0.00  | 2.93  | 8.14  | 0.48  | 0.10  |
|     | 2   | 1.42   | 2.02   | 1.86   | 3.29   | 0.40   | 0.37   | -       | 0.57     | 3.84      | 0.00  | 1.05  | 2.84  | 0.37  | 0.13  |
|     | 5   | 2.47   | 3.12   | 2.34   | 3.55   | 0.11   | 0.04   | -       | 0.13     | 3.34      | 0.00  | 3.35  | 8.61  | 0.89  | 0.23  |
| 100 | 10  | 2.69   | 2.76   | 2.34   | 3.56   | 0.28   | -      | 0.29    | 0.58     | 2.45      | 0.01  | 5.89  | 20.14 | 1.27  | 0.32  |
|     | 20  | 2.17   | 2.11   | 1.67   | 4.48   | 0.47   | 0.16   | -       | 0.57     | 3.95      | 0.01  | 24.13 | 61.29 | 2.41  | 0.56  |
|     | 2   | 1.15   | 2.16   | 1.37   | 2.33   | 0.45   | 0.41   | -       | 1.00     | 3.99      | 0.00  | 3.92  | 15.48 | 2.63  | 0.81  |
| 200 | 5   | 2.05   | 2.66   | 2.18   | 3.98   | -      | 0.10   | 0.11    | 0.97     | 4.11      | 0.01  | 12.45 | 33.78 | 4.90  | 1.23  |
|     | 10  | 2.65   | 3.17   | 2.49   | 4.37   | 0.06   | -      | 0.22    | 0.78     | 4.16      | 0.01  | 24.37 | 65.53 | 7.09  | 1.89  |
|     | 20  | 2.79   | 2.59   | 1.85   | 4.37   | 0.34   | 0.21   | -       | 1.02     | 4.11      | 0.01  | 68.39 | 260   | 17.71 | 2.66  |
| 200 | 2   | 0.75   | 1.54   | 1.46   | 2.52   | 0.27   | 0.02   | -       | 0.85     | 3.64      | 0.02  | 32.70 | 95.11 | 28.09 | 8.67  |
|     | 5   | 1.70   | 2.46   | 2.01   | 3.83   | 0.01   | 0.25   | -       | 0.96     | 3.95      | 0.02  | 79.11 | 221   | 44.38 | 13.55 |
|     | 10  | 2.15   | 3.11   | 2.36   | 4.58   | 0.23   | 0.45   | -       | 0.92     | 3.53      | 0.03  | 292   | 787   | 68.20 | 17.94 |
|     | 20  | 1.84   | 2.22   | 1.76   | 4.18   | -      | 0.02   | 0.01    | 0.82     | 3.22      | 0.07  | 1248  | 3640  | 224   | 33.75 |

Table 9: Comparison of average costs in percentage and average running times for group  $G_4$ 

| $n$ | $m$ | $WSTP$ | $WSMP$ | $WSMC$ | $WSPL$ | $WECT$ | $LP_1$ | $LP_2$ | $LP_2''$ | $LP_2'''$ | $T_1$ | $T_2$ | $T_3$ | $T_4$ | $T_5$ |
|-----|-----|--------|--------|--------|--------|--------|--------|--------|----------|-----------|-------|-------|-------|-------|-------|
| 20  | 2   | 2.24   | 1.65   | 1.69   | 2.38   | -      | 0.09   | 0.27   | 0.56     | 0.67      | 0.00  | 0.09  | 0.33  | 0.05  | 0.01  |
|     | 5   | 1.86   | 1.83   | 1.80   | 1.74   | -      | 0.12   | 0.16   | 0.29     | 1.83      | 0.00  | 0.43  | 1.21  | 0.13  | 0.02  |
|     | 10  | 1.70   | 1.67   | 1.47   | 4.01   | -      | 0.11   | 0.05   | 0.27     | 2.78      | 0.00  | 1.52  | 5.14  | 0.38  | 0.07  |
| 50  | 20  | 1.89   | 1.68   | 1.36   | 6.76   | -      | 0.09   | 0.02   | 0.68     | 1.06      | 0.00  | 2.52  | 9.30  | 0.68  | 0.12  |
|     | 2   | 1.11   | 1.57   | 1.63   | 1.83   | -      | 0.36   | 0.17   | 0.63     | 3.79      | 0.00  | 1.06  | 3.08  | 0.54  | 0.17  |
|     | 5   | 1.90   | 2.45   | 2.28   | 3.24   | -      | 0.25   | 0.14   | 0.80     | 2.84      | 0.00  | 2.11  | 7.87  | 1.05  | 0.27  |
| 100 | 10  | 2.12   | 2.13   | 1.92   | 4.45   | -      | 0.17   | 0.01   | 0.46     | 3.45      | 0.00  | 9.37  | 24.36 | 2.54  | 0.54  |
|     | 20  | 1.78   | 2.21   | 2.20   | 6.52   | -      | 0.26   | 0.02   | 0.89     | 3.06      | 0.01  | 26.19 | 77.47 | 5.13  | 1.03  |
|     | 2   | 1.03   | 1.43   | 1.09   | 1.39   | -      | 0.08   | 0.02   | 1.24     | 4.62      | 0.00  | 3.76  | 14.66 | 2.92  | 1.22  |
| 200 | 5   | 1.98   | 1.92   | 1.69   | 3.39   | -      | 0.25   | 0.18   | 0.89     | 3.46      | 0.01  | 14.30 | 42.03 | 6.34  | 1.77  |
|     | 10  | 1.98   | 2.28   | 2.11   | 3.54   | -      | 0.55   | 0.04   | 0.91     | 3.76      | 0.01  | 44.75 | 113   | 10.38 | 2.64  |
|     | 20  | 1.21   | 2.43   | 2.17   | 4.21   | -      | 0.20   | 0.13   | 0.59     | 3.41      | 0.01  | 152   | 375   | 32.72 | 5.38  |
| 200 | 2   | 0.89   | 1.34   | 1.12   | 1.34   | -      | 0.07   | 0.06   | 0.93     | 4.77      | 0.02  | 36.79 | 95.98 | 25.53 | 8.71  |
|     | 5   | 1.22   | 2.24   | 2.17   | 3.19   | -      | 0.15   | 0.14   | 1.33     | 4.42      | 0.02  | 80.89 | 215   | 49.16 | 15.88 |
|     | 10  | 1.55   | 2.51   | 2.22   | 4.57   | -      | 0.04   | 0.01   | 0.66     | 4.05      | 0.03  | 369   | 917   | 105   | 25.79 |
|     | 20  | 1.30   | 1.99   | 1.92   | 4.65   | -      | 0.08   | 0.06   | 0.88     | 3.78      | 0.07  | 1699  | 4471  | 287   | 39.59 |

Table 10: Comparison of average costs in percentage and average running times for group  $G_5$ 

| $n$ | $m$ | $WSTP$ | $WSMP$ | $WSMC$ | $WSPL$ | $WECT$ | $LP_1$ | $LP'_2$ | $LP''_2$ | $LP'''_2$ | $T_1$ | $T_2$ | $T_3$ | $T_4$ | $T_5$ |
|-----|-----|--------|--------|--------|--------|--------|--------|---------|----------|-----------|-------|-------|-------|-------|-------|
| 20  | 2   | 1.78   | 1.49   | 1.30   | 6.84   | 0.75   | 0.59   | -       | 0.12     | 0.50      | 0.00  | 0.11  | 0.37  | 0.05  | 0.01  |
|     | 5   | 5.91   | 9.37   | 4.44   | 9.67   | 2.82   | 1.48   | -       | 0.33     | 1.96      | 0.00  | 0.49  | 1.32  | 0.21  | 0.04  |
|     | 10  | 5.30   | 7.32   | 5.18   | 16.22  | 0.21   | 0.43   | -       | 0.33     | 1.50      | 0.02  | 0.94  | 3.31  | 0.51  | 0.10  |
|     | 20  | 5.30   | 9.48   | 5.86   | 12.77  | -      | 0.20   | 0.60    | 1.08     | 1.99      | 0.02  | 5.08  | 13.52 | 1.82  | 0.28  |
| 50  | 2   | 3.86   | 5.35   | 3.52   | 12.06  | 2.26   | 1.83   | -       | 0.56     | 4.02      | 0.02  | 0.76  | 2.86  | 0.59  | 0.19  |
|     | 5   | 7.00   | 9.57   | 7.30   | 15.70  | 2.21   | 2.48   | -       | 0.45     | 2.48      | 0.02  | 3.08  | 9.04  | 1.53  | 0.36  |
|     | 10  | 7.65   | 11.83  | 8.69   | 13.53  | 2.96   | 2.73   | -       | 0.61     | 2.99      | 0.02  | 9.33  | 32.26 | 5.97  | 0.97  |
|     | 20  | 9.38   | 15.78  | 9.83   | 18.29  | 2.17   | 1.99   | -       | 1.09     | 2.98      | 0.09  | 32.64 | 108   | 15.68 | 2.35  |
| 100 | 2   | 3.01   | 4.99   | 3.22   | 14.94  | 1.77   | 1.28   | -       | 0.94     | 4.98      | 0.03  | 4.82  | 14.72 | 3.53  | 1.19  |
|     | 5   | 7.35   | 10.26  | 7.39   | 17.46  | 2.42   | 2.54   | -       | 1.06     | 4.80      | 0.02  | 13.83 | 42.01 | 7.67  | 2.20  |
|     | 10  | 7.90   | 12.93  | 10.49  | 15.52  | 2.19   | 2.20   | -       | 0.73     | 3.11      | 0.09  | 39.37 | 124   | 21.76 | 4.09  |
|     | 20  | 5.87   | 16.84  | 14.02  | 15.98  | 1.67   | 1.66   | -       | 0.35     | 2.72      | 0.06  | 244   | 863   | 83.76 | 14.16 |
| 200 | 2   | 3.01   | 5.26   | 3.58   | 17.26  | 2.43   | 2.08   | -       | 1.16     | 5.29      | 0.08  | 30.78 | 96.56 | 26.31 | 9.06  |
|     | 5   | 6.04   | 11.28  | 8.85   | 17.14  | 2.49   | 2.73   | -       | 1.22     | 4.34      | 0.08  | 89.83 | 227   | 48.75 | 14.14 |
|     | 10  | 6.53   | 14.49  | 11.63  | 16.66  | 2.44   | 2.71   | -       | 0.82     | 3.53      | 0.10  | 278   | 935   | 112   | 25.94 |
|     | 20  | 6.44   | 16.50  | 13.95  | 18.69  | 1.57   | 1.54   | -       | 1.01     | 3.49      | 0.09  | 1755  | 5437  | 409   | 68.94 |



Table 11: The percentage that the average costs of  $LP_2''$  and  $LP_2'''$  are larger than that of  $LP_2'$

| $n$ | $m$ | $G_1$    |           | $G_2$    |           | $G_3$    |           | $G_4$    |           | $G_5$    |           |
|-----|-----|----------|-----------|----------|-----------|----------|-----------|----------|-----------|----------|-----------|
|     |     | $LP_2''$ | $LP_2'''$ | $LP_2''$ | $LP_2'''$ | $LP_2''$ | $LP_2'''$ | $LP_2''$ | $LP_2'''$ | $LP_2''$ | $LP_2'''$ |
| 20  | 2   | 0.09     | 2.27      | 0.31     | 2.32      | 0.13     | 1.33      | 0.18     | 0.47      | 0.12     | 0.50      |
|     | 5   | 0.79     | 2.38      | 0.22     | 1.62      | 0.11     | 0.77      | 0.13     | 1.67      | 0.33     | 1.96      |
|     | 10  | 1.30     | 2.17      | 0.26     | 1.73      | 0.11     | 0.95      | 0.22     | 2.73      | 0.33     | 1.50      |
|     | 20  | 2.08     | 2.23      | 0.03     | 1.37      | 0.07     | 0.99      | 0.66     | 1.04      | 0.42     | 1.39      |
| 50  | 2   | 0.98     | 2.11      | 0.74     | 3.30      | 0.57     | 3.84      | 0.46     | 3.62      | 0.56     | 4.02      |
|     | 5   | 3.30     | 5.90      | 0.73     | 2.36      | 0.13     | 3.34      | 0.66     | 2.70      | 0.45     | 2.48      |
|     | 10  | 0.36     | 1.26      | 0.74     | 2.30      | 0.29     | 2.16      | 0.45     | 3.44      | 0.61     | 2.99      |
|     | 20  | 0.09     | 3.84      | 0.88     | 2.14      | 0.57     | 3.95      | 0.87     | 2.17      | 1.09     | 2.98      |
| 100 | 2   | 1.02     | 4.72      | 1.16     | 3.28      | 1.00     | 3.99      | 1.22     | 4.60      | 0.94     | 4.98      |
|     | 5   | 0.9      | 4.54      | 1.20     | 3.32      | 0.86     | 4.00      | 0.71     | 3.28      | 1.06     | 4.80      |
|     | 10  | 0.74     | 3.35      | 1.41     | 2.90      | 0.56     | 3.94      | 0.87     | 3.72      | 0.73     | 3.11      |
|     | 20  | 0.29     | 1.25      | 0.80     | 2.72      | 1.02     | 4.11      | 0.46     | 3.28      | 0.35     | 2.72      |
| 200 | 2   | 1.12     | 1.75      | 0.73     | 3.73      | 0.85     | 3.64      | 0.87     | 4.71      | 1.16     | 5.29      |
|     | 5   | 1.21     | 2.78      | 1.47     | 3.76      | 0.96     | 3.95      | 1.19     | 4.28      | 1.22     | 4.34      |
|     | 10  | 1.08     | 2.03      | 1.21     | 3.32      | 0.92     | 3.53      | 0.65     | 4.04      | 0.82     | 3.53      |
|     | 20  | 0.52     | 2.88      | 1.29     | 2.91      | 0.81     | 3.21      | 0.82     | 3.72      | 1.01     | 3.49      |
